# Supplementary material for: Sequential molecular doping of non-fullerene organic solar cells without hole transport layers
Source: Royal Society of Chemistry journal article supplement (doi:10.1039/c9tc04969j), 2019-11-11
Supplement: c9tc04969j1.pdf [file c9tc04969j1.pdf]

## Supporting Information

### **Sequential molecular doping of non-fullerene organic solar cells without hole transport layers**

Dongyang Zhang,<sup>a</sup> Jianqiu Wang,<sup>ab</sup> Xuning Zhang,<sup>a</sup> Jiyu Zhou,<sup>a</sup> Saud-uz-Zafar,<sup>b</sup> Huiqiong Zhou,<sup>b</sup> Yuan Zhang<sup>\*a</sup>

<sup>a</sup> School of Chemistry  
Beijing Advanced Innovation Center for Biomedical Engineering  
Beihang University  
No. 37 Xueyuan Road, Beijing 100191, P. R. China  
E-mail: [yuanzhang@buaa.edu.cn](mailto:yuanzhang@buaa.edu.cn)

<sup>b</sup> Key Laboratory of Nanosystem and Hierarchical Fabrication  
CAS Center for Excellence in Nanoscience,  
National Center for Nanoscience and Technology  
Beijing 100190, P. R. China  
E-mail: [zhouhq@nanoctr.cn](mailto:zhouhq@nanoctr.cn)

**Table S1.** Photovoltaic parameters of best PBDB-T:ITIC solar cells at different doping conditions.

| Doping method     | HTL              | Doping condition | $V_{oc}$ (V) | $J_{sc}$ (mA/cm <sup>2</sup> ) | FF (%) | PCE (%) |
|-------------------|------------------|------------------|--------------|--------------------------------|--------|---------|
| Bulk doping       | MoO <sub>x</sub> | 0%               | 0.89         | 16.61                          | 67.71  | 10.01   |
|                   |                  | 0.1%             | 0.89         | 16.10                          | 67.90  | 9.73    |
|                   |                  | 0.2%             | 0.89         | 15.67                          | 65.17  | 9.09    |
| Sequential doping | MoO <sub>x</sub> | 30 s             | 0.89         | 16.83                          | 71.16  | 10.66   |
|                   | w/o              | w/o              | 0.16         | 12.67                          | 42.09  | 0.85    |
|                   |                  | 0 s              | 0.87         | 16.28                          | 64.24  | 9.10    |
|                   |                  | 20 s             | 0.87         | 16.00                          | 68.34  | 9.51    |
|                   |                  | 40 s             | 0.87         | 17.01                          | 67.34  | 9.97    |
|                   |                  | 60 s             | 0.87         | 16.78                          | 65.20  | 9.52    |
|                   |                  | 80 s             | 0.87         | 16.06                          | 64.96  | 9.07    |

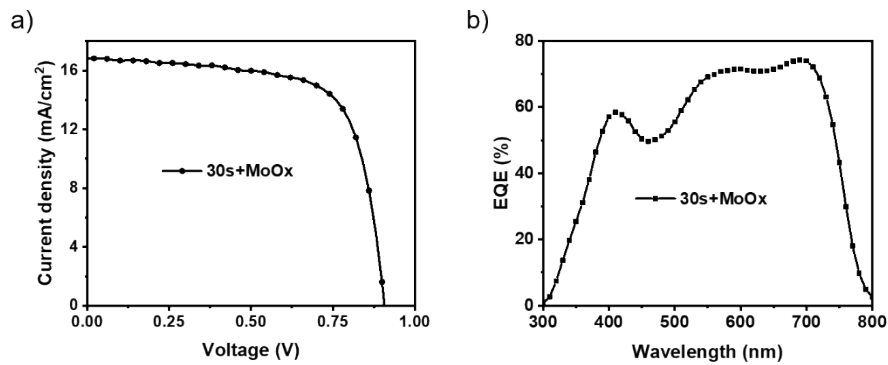

**Figure S1.** (a) Current density versus voltage (J-V) characteristics of sequential molecular doping device with MoO<sub>x</sub> after 30s penetration under AM 1.5 G solar irradiation. (b) EQE spectra of sequentially doped PBDBT:ITIC solar cells with MoO<sub>x</sub> after 30s penetration.

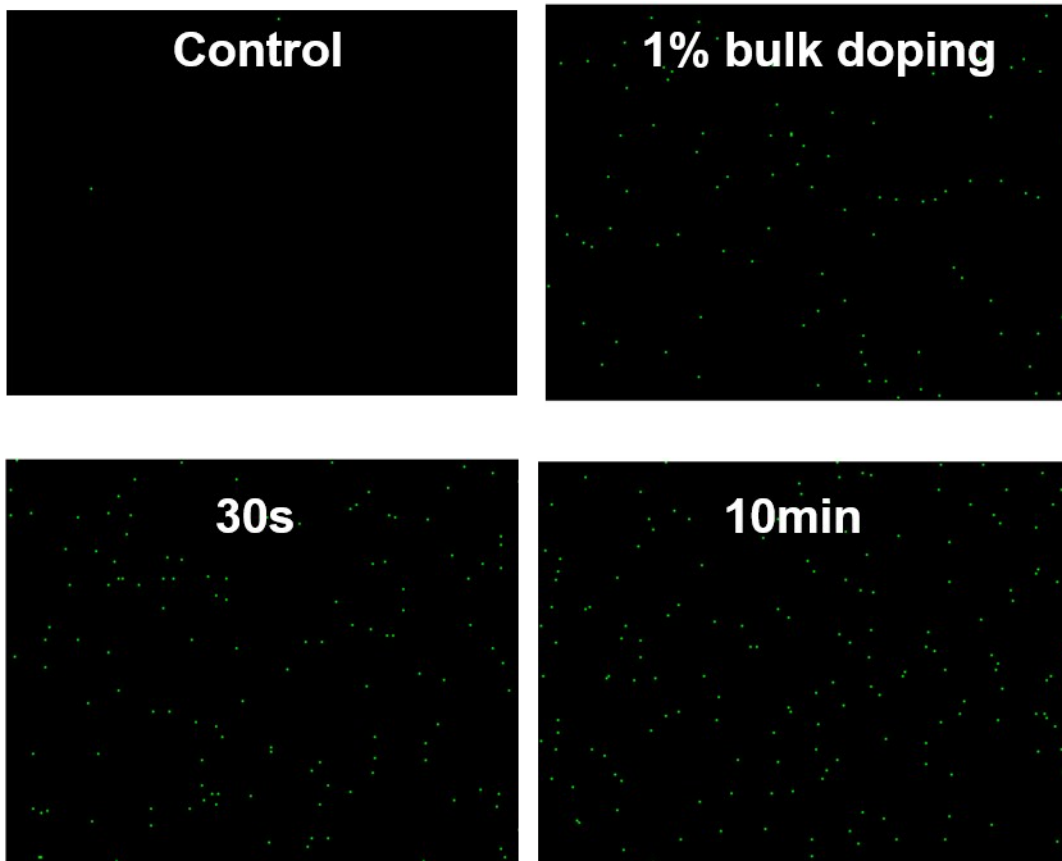

**Figure S2.** Elemental mapping of fluorine based on EDX analysis of PBDB-T:ITIC BHJ films with different doping methods.

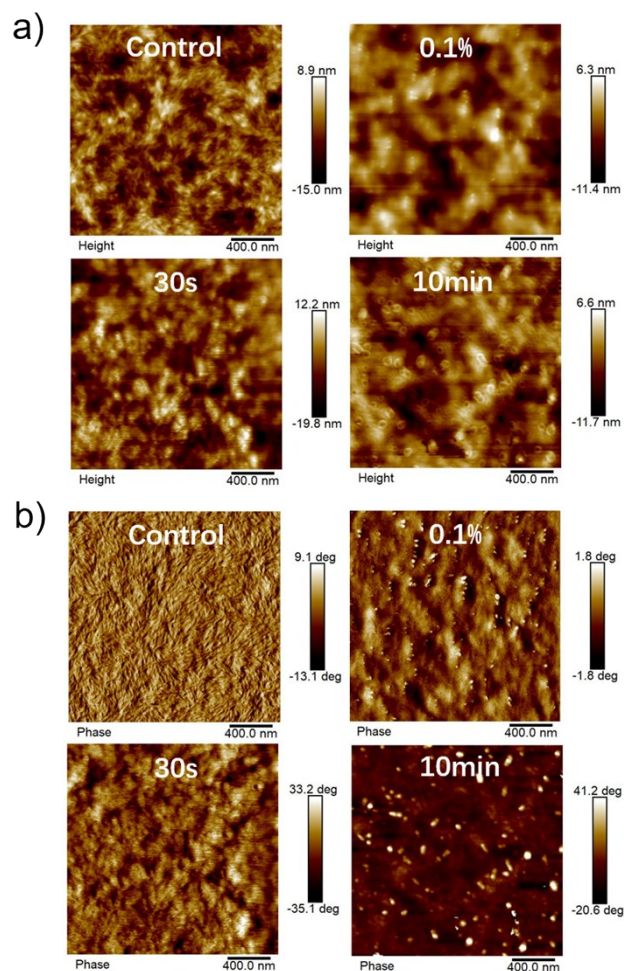

**Figure S3.** (a) Topographic and (b) phase images of pristine, bulk doped (0.1%) and sequentially doped (30 s and 10 min) PBDB-T:ITIC BHJ films.

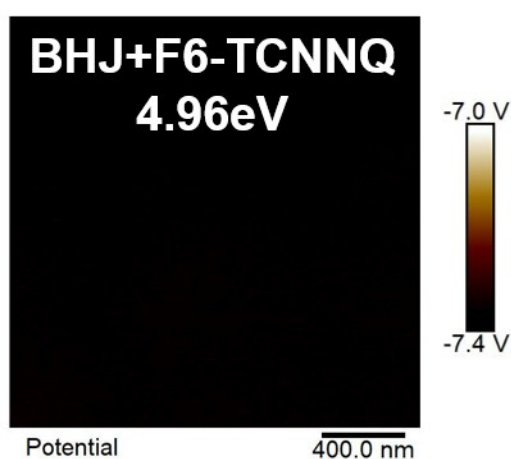

**Figure S4.** 2D mapping of the surface potential attained by scanning Kelvin probe microscopy for BHJ film spun-coat with F6-TCNNQ solution (conc. = 1.5 mg/mL).

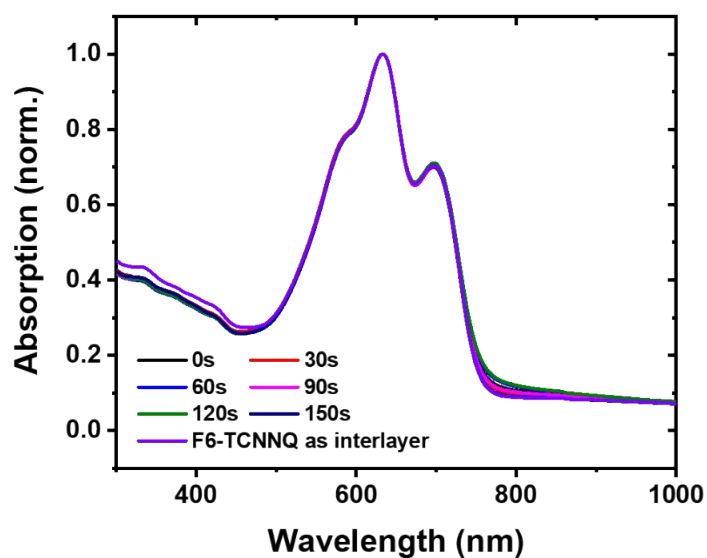

**Figure S5.** Absorption spectra of PBDB-T:ITIC BHJ films in different sequential doping conditions.

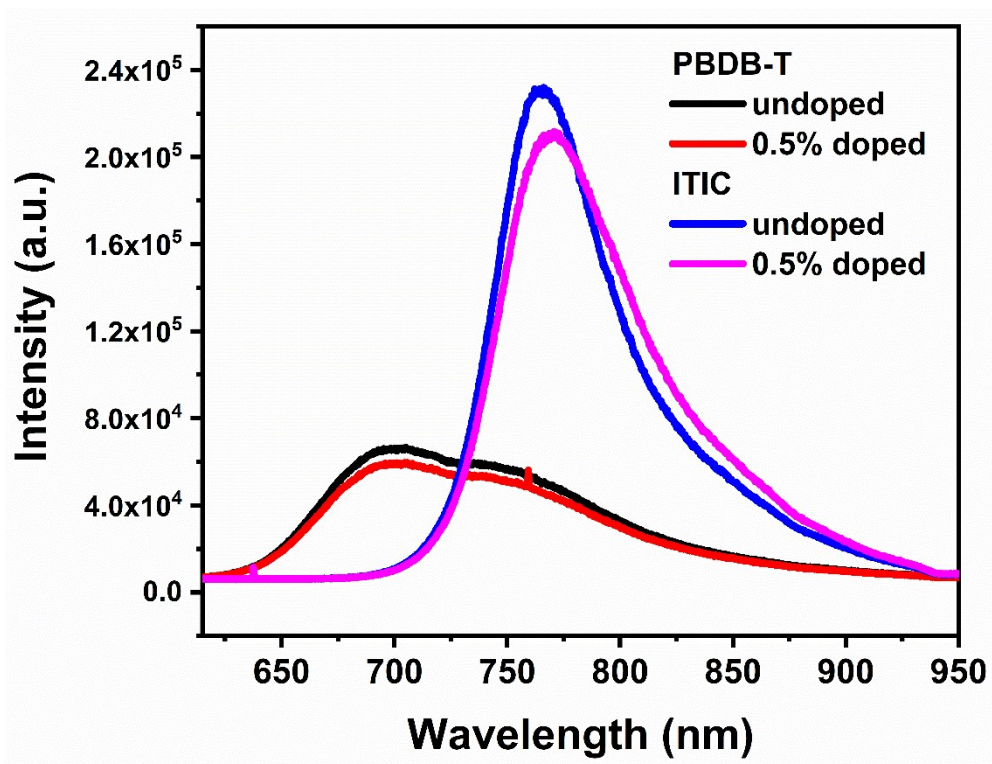

**Figure S6.** Steady-state photoluminescence (PL) spectra of undoped and F6-TCNNQ doped PBDB-T or ITIC films in different conditions.

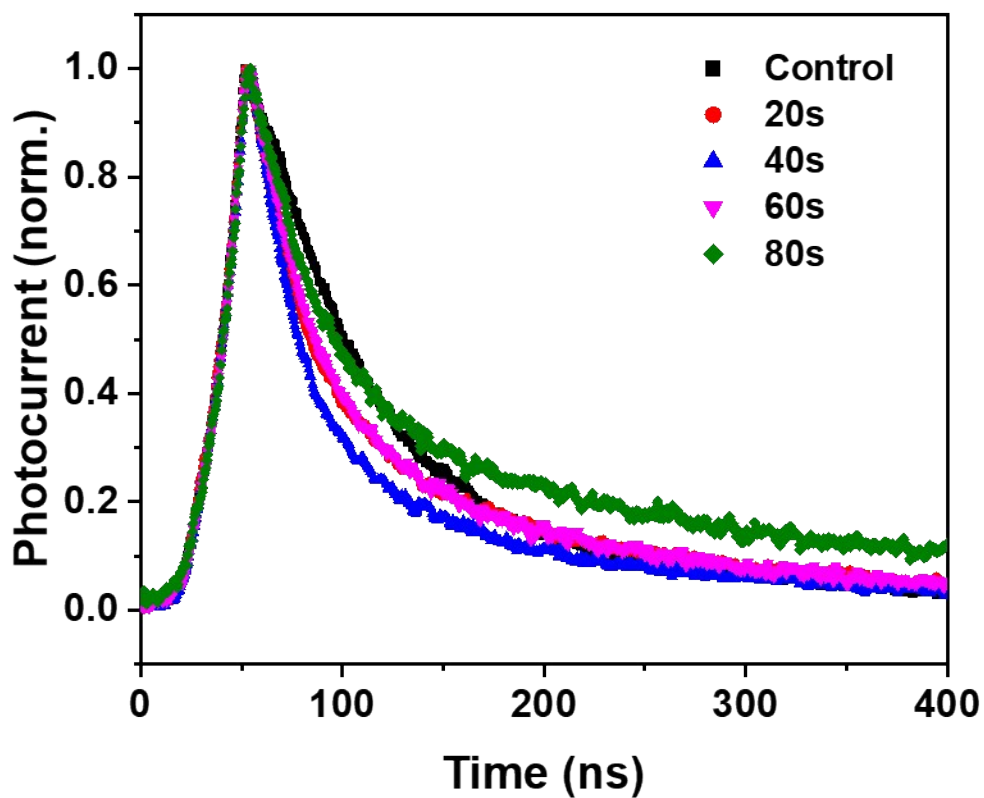

**Figure S7.** Transient photocurrent (bias = 0 V) decay traces of sequentially doped PBDBT:ITIC solar cells without MoOx under 488 nm excitation.

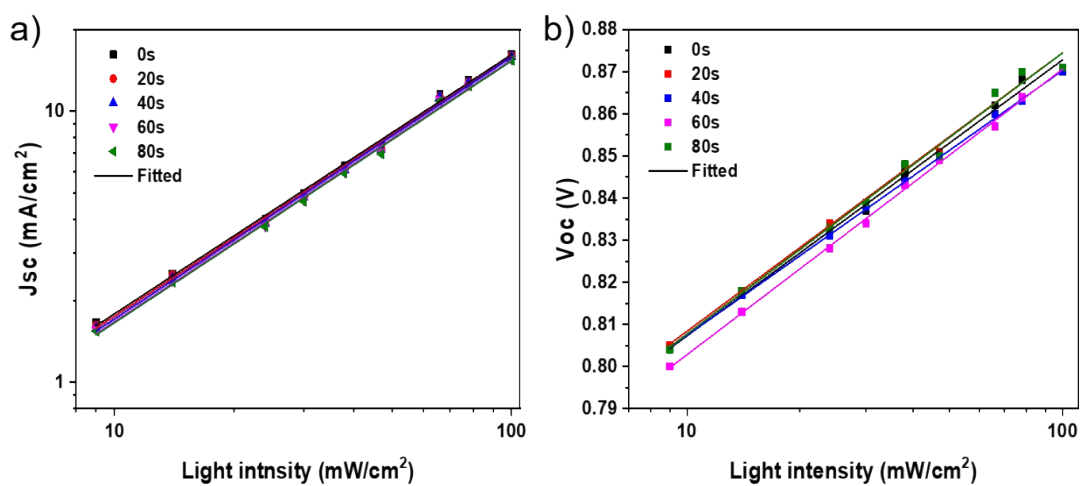

**Figure S8.** Short-current ( $J_{SC}$ ) and open-circuit voltage ( $V_{OC}$ ) versus light intensity characteristics.

**Table S2.** Extracted slopes of  $J_{SC}$  vs.  $P_{light}$  and  $V_{OC}$  vs.  $P_{light}$  characteristics.

| Doping condition | Slope of $J_{SC}$ vs. $P_{light}$ | Slope of $V_{OC}$ vs. $P_{light}$ ( $k_B T/q$ ) |
|------------------|-----------------------------------|-------------------------------------------------|
| 0 s              | 0.956                             | 1.109                                           |
| 20 s             | 0.958                             | 1.119                                           |
| 40 s             | 0.966                             | 1.065                                           |
| 60 s             | 0.966                             | 1.130                                           |
| 80 s             | 0.966                             | 1.148                                           |

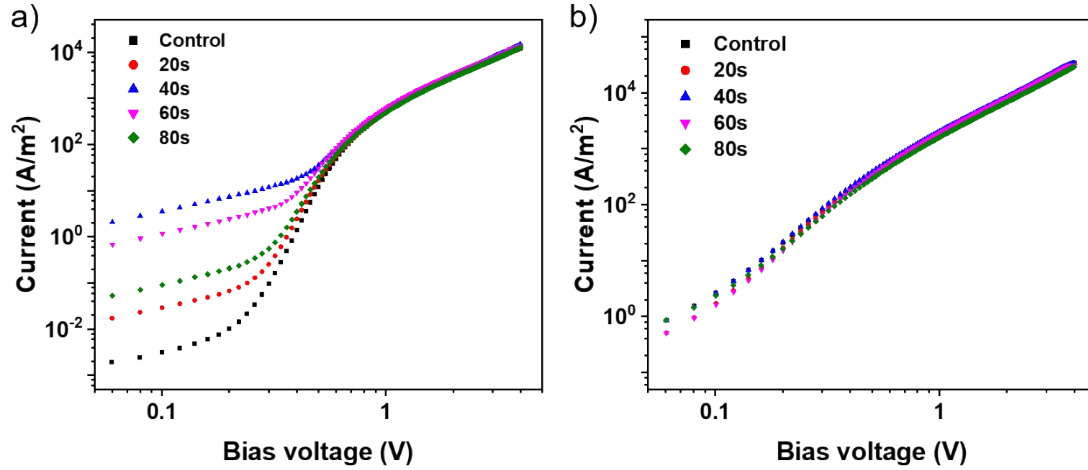

**Figure S9.** Dark  $J$ - $V$  characteristics of (a) hole-only devices based on the structure of ITO/PEDOT:PSS/doped BHJ/Au and (b) electron-only devices based on the structure of ITO/ZnO/doped BHJ/ BCP/Al. The active layers are PBDB-T:ITIC blend films in different doping conditions.
